# Supplementary material for: The nucleotide‐dependent interaction of FlaH and FlaI is essential for assembly and function of the archaellum motor
Source: PubMed Central journal article supplement — Mol Microbiol. 2015 Nov 17;99(4):674–85. doi: 10.1111/mmi.13260 (PMC5019145; doi:10.1111/mmi.13260), 2015-11-17
Supplement: MMI-99-674-s001.pdf [file MMI-99-674-s001.pdf]

**Supplementary to ‘The Nucleotide-Dependent Interaction of FlaH and FlaI is Essential for Assembly and Function of the Archaeellum Motor**

**Paushali Chaudhury<sup>1#</sup>, Tomasz Neiner<sup>1#</sup>, Edoardo D’Imprima<sup>2#</sup>, Ankan Banerjee<sup>3#</sup>, Sophia Reindl<sup>4#</sup>, Abhrajyoti Ghosh<sup>1</sup>, Andrew S. Arvai<sup>4</sup>, Deryck J. Mills<sup>2</sup>, Chris van der Does<sup>1</sup>, John A. Tainer<sup>4,5</sup>, Janet Vonck<sup>2</sup>, and Sonja-Verena Albers<sup>1</sup>**

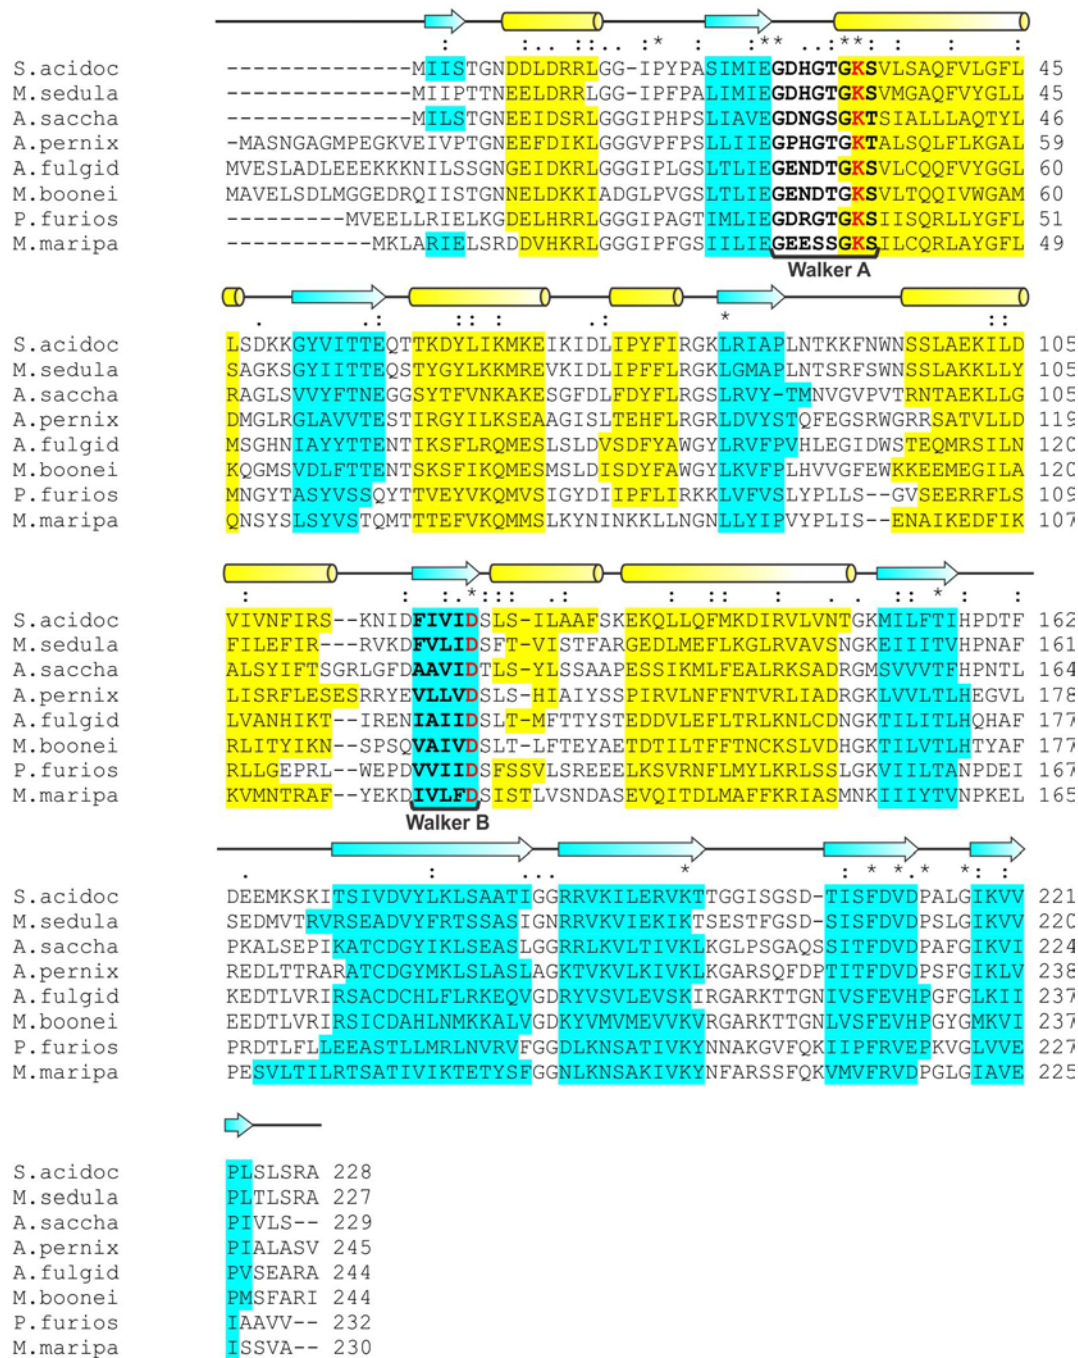

**Figure S1 Multiple sequence alignment and secondary structure prediction of FlaH homologues from different archaeal species.** *Sulfolobus acidocaldarius* FlaH homologues were identified with BLAST analysis (1) and aligned using ClustalW (2). A secondary structure prediction for all aligned FlaH homologues was performed using PSIPRED (3). The structural predictions were consistent for all the homologues: predicted  $\alpha$ -helices are highlighted in yellow,  $\beta$ -sheets in cyan. The identified Walker motifs are marked with a bold font and the highly conserved lysine in the Walker A motif and the aspartic acid in the Walker B box are highlighted in red. (Strains: *Metallosphaera sedula*, *Acidilobus saccharovorans*, *Aeropyrum pernix*, *Archaeoglobus fulgidus*, *Methanoregula boonei*, *Pyrococcus furiosus*, *Methanococcus maripaludis*)

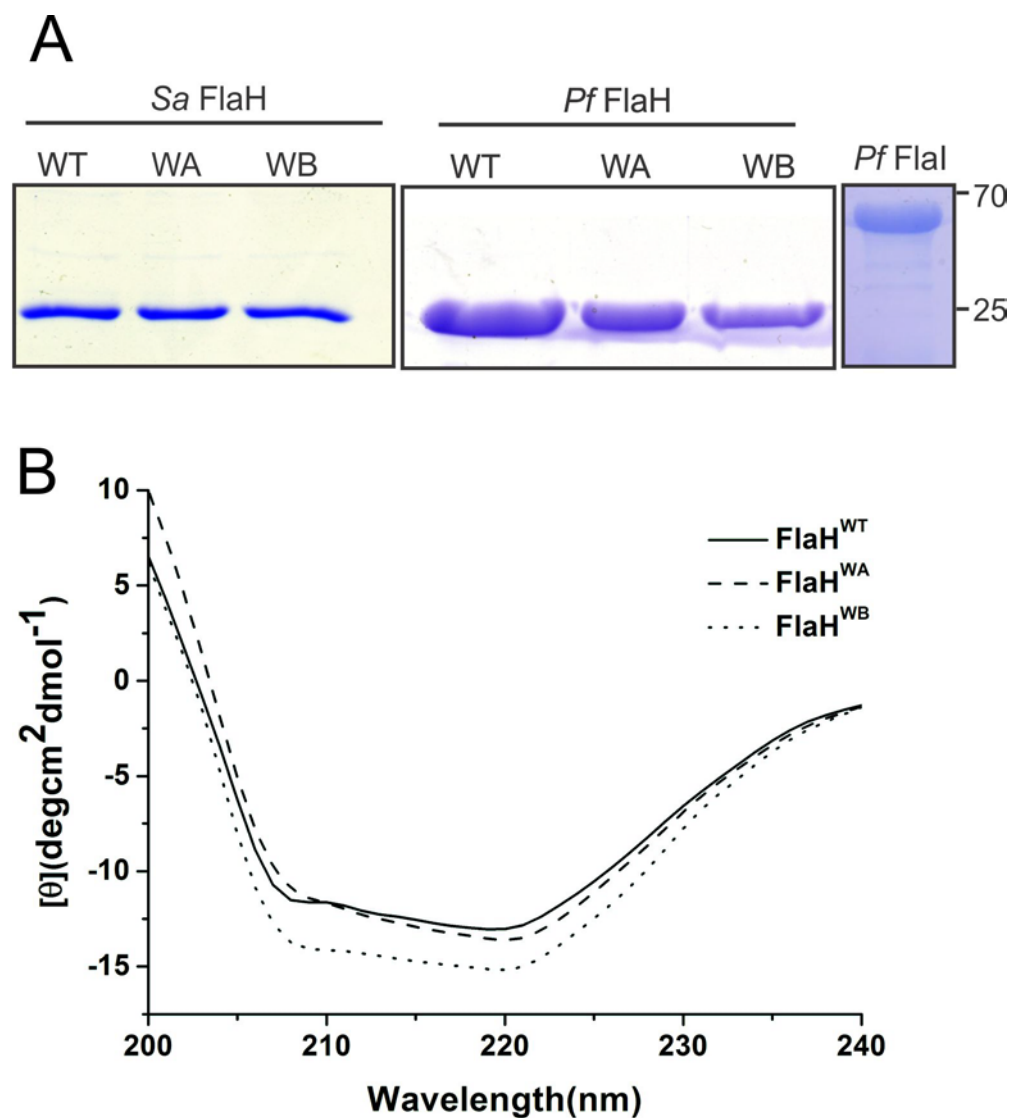

**Figure S2 Purified SaFlaH and PfFlaH and their Walker A and B mutants and CD analysis on the PfFlaH and mutants** (A) Coomassie stained SDS-PAGE of purified FlaH variants (FlaH<sup>WT</sup>, FlaH<sup>WA</sup>, FlaH<sup>WB</sup>). Molecular masses are indicated in kDa. (B) Far-UV CD spectra (200-240 nm) of FlaH<sup>WT</sup>, FlaH<sup>WA</sup> and FlaH<sup>WB</sup> (4.5-5.5  $\mu$ M) in 10mM HEPES pH 7.2, 100 mM NaCl at room temperature in a Jasco J-810 spectro polarimeter. Experiments were conducted in 1 mm path length cells. Far-UV spectra of the tested proteins are presented as the smoothed mean of three accumulations. Characteristic CD spectral profiles having two minima at 222 nm and 208 nm indicate FlaH wildtype as well as the mutants are able to fold properly.

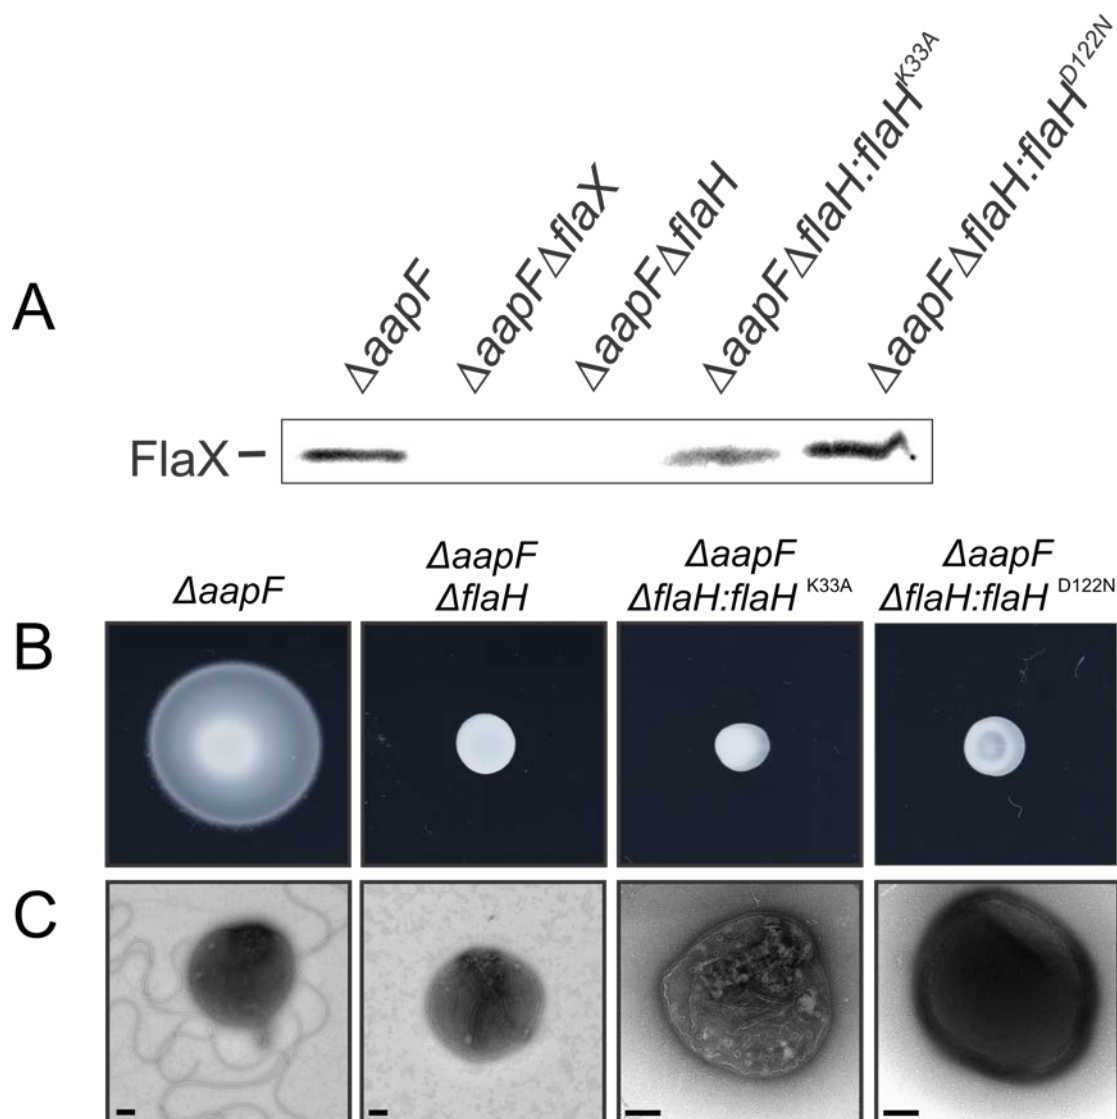

**Figure S3 ATP binding to FlaH is essential for archaellation.** (A) Membranes isolated from the indicated *S. acidocaldarius* strains were separated on SDS-PAGE, blotted to PVDF membranes and Western Blot analysis was performed using anti-FlaX antibodies. (B) Motility assay on semi solid swarm plates using the indicated *S. acidocaldarius* strains. (C) Electron micrographs of negatively stained cells of the indicated *S. acidocaldarius* strains (Scale bar: 200 nm).

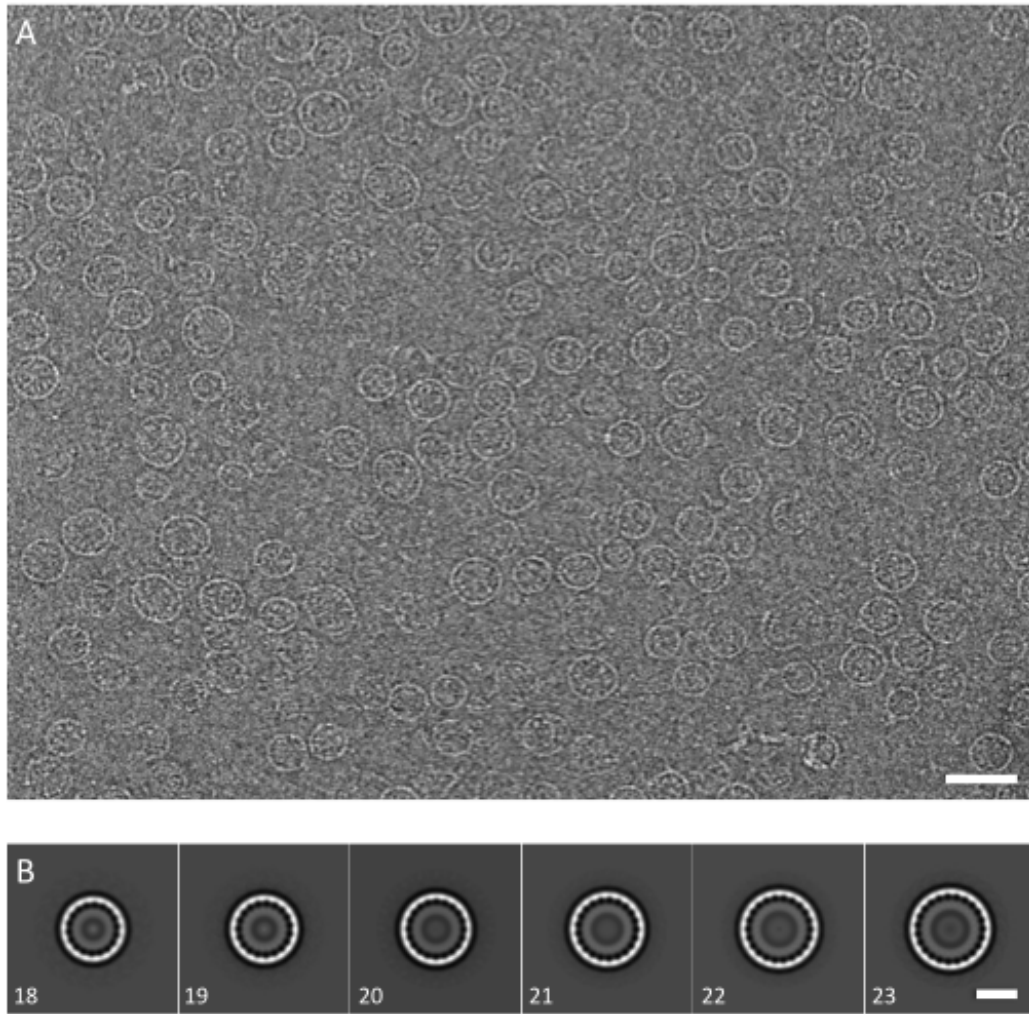

**Figure S4 Cryo-electron microscopy and image processing of FlaX/FlaH complexes.** (A) A typical micrograph of the complex at 3  $\mu\text{m}$  defocus. (B) Class averages after multireference alignment in order of increasing size with rotational symmetry applied from 18 (*left*) to 23 (*right*). The number of particles per class follows a Gaussian distribution with a maximum at 20. A diffuse ring is visible inside the SaFlaX ring, showing that SaFlaH is not present with the same stoichiometry as SaFlaX. The scale bar is 50 nm in A and 20 nm in B.

**Table S1. Strains used in present study**

| Strains                         | Relevant characteristics                                                                                     | Source     |
|---------------------------------|--------------------------------------------------------------------------------------------------------------|------------|
| <b><i>E. coli</i></b>           |                                                                                                              |            |
| DH5 $\alpha$                    | l2 f80d/lacZ DM15 D(lacZYA-argF )U169 recA1 endA1 hsdR17 (rK2 mK1) supE44 thi-1 gyrA relA1                   | Gibco      |
| BI21(DE3)-RIL                   | B F-ompThsdS(rB – mB – ) dcm + Tetr E. coli gal $\lambda$ (DE3) endAHte [argUileYleuWCam']                   | Stratagene |
| ER1821                          | F-glnV44 e14 <sup>-</sup> (McrA <sup>-</sup> ) rfbD1? relA1? endA1 spoT1? thi-1 $\Delta$ (mcrC-mrr)114::IS10 | NEB        |
| <b><i>S. acidocaldarius</i></b> |                                                                                                              |            |
| DSM639                          | Wild-type <i>Sulfolobus acidocaldarius</i>                                                                   | DSMZ       |
| MW001                           | DSM 639 $\Delta$ pyrE                                                                                        | (17)       |
| MW156                           | MW001 $\Delta$ aapF ( <i>Saci_2318</i> )                                                                     | (4)        |
| MW455                           | MW156 $\Delta$ flaH ( <i>Saci_1174</i> )                                                                     | (4)        |
| MW466                           | MW156 <i>flaH</i> K33A                                                                                       | This study |
| MW467                           | MW156 <i>flaH</i> D122N                                                                                      | This study |
| <b><i>P. furiosus</i></b>       |                                                                                                              |            |
| DSM3638                         | Wild-type <i>Pyrococcus furiosus</i>                                                                         | DSMZ       |

**Table S2 Plasmids used in present study**

| <b>Plasmids</b> | <b>Relevant characteristics</b>                                                                                                                                                                                | <b>Source</b>            |
|-----------------|----------------------------------------------------------------------------------------------------------------------------------------------------------------------------------------------------------------|--------------------------|
| pETDuet-1       | Amp <sup>r</sup> , Cam <sup>r</sup> , expression plasmid containing replicon ColE1 (pBR322) and two MCS (MCS1 and MCS2)                                                                                        | Novagen                  |
| pUC57           | Amp <sup>r</sup> , <i>E. coli</i> cloning vector                                                                                                                                                               |                          |
| pSVA251         | Amp <sup>r</sup> , Cam <sup>r</sup> , pETDuet-1 carrying untagged <i>flaI</i> in MCS2 using restriction sites NdeI-XhoI                                                                                        | (Ghosh et al., 2011a)    |
| pSVA284         | Amp <sup>r</sup> codon optimized <i>flaH</i> ( <i>sflaH</i> ) in pUC57                                                                                                                                         |                          |
| pSVA293         | Amp <sup>r</sup> , Cam <sup>r</sup> , pETDuet-1 carrying C-terminal His <sub>6</sub> tagged <i>sflaH</i> in MCS2 using restriction sites NdeI-XhoI                                                             | This study               |
| pSVA406         | Amp <sup>r</sup> , gene targeting plasmid, pGEM-T Easy backbone, pyrEF cassette of <i>S. solfataricus</i>                                                                                                      | (Wagner et al., 2012)    |
| pSVA1911        | Del 37 FlaX ( <i>flaXc</i> ) gene in pSA4 using restriction sites NcoI-BamHI                                                                                                                                   | (Banerjee et al., 2012a) |
| pSVA1934        | Amp <sup>r</sup> , Cam <sup>r</sup> , pETDuet-1 Carrying N-terminal His <sub>6</sub> tagged <i>flaXcn</i> (37 <sup>th</sup> -127 <sup>th</sup> amino acid FlaX) in MCS1 using restriction sites EcoRI-HindIII  | (Banerjee et al., 2012a) |
| pSVA1935        | Amp <sup>r</sup> , Cam <sup>r</sup> , pETDuet-1 Carrying N-terminal His <sub>6</sub> tagged <i>flaXcc1</i> (87 <sup>th</sup> -250 <sup>th</sup> amino acid FlaX) in MCS1 using restriction sites EcoRI-HindIII | (Banerjee et al., 2012a) |
| pSVA2100        | Amp <sup>r</sup> , Cam <sup>r</sup> , pETDuet-1 carrying N-terminal His <sub>6</sub> tagged <i>sflaH</i> in MCS1 using restriction sites EcoRI-HindIII                                                         | This study               |
| pSVA2108        | Amp <sup>r</sup> , Cam <sup>r</sup> , pETDuet-1 carrying N-terminal Strep tagged <i>sflaH</i> in MCS2 using restriction sites NdeI-XhoI                                                                        | This study               |
| pSVA2113        | Amp <sup>r</sup> , <i>flaH</i> K33A cloned into pSVA406 with ApaI-PstI                                                                                                                                         | This study               |
| pSVA2124        | Amp <sup>r</sup> , <i>flaH</i> D122N cloned into pSVA406 with ApaI-PstI                                                                                                                                        | This study               |
| pSVA2126        | Amp <sup>r</sup> , <i>flaH</i> cloned into pSVA406 with ApaI-PstI                                                                                                                                              | This study               |
| pSVA2130        | Amp <sup>r</sup> , Cam <sup>r</sup> , pETDuet-1 carrying N-terminal His <sub>6</sub> tagged <i>sflaH</i> K33A in MCS1 using restriction sites EcoRI-HindIII                                                    | This study               |
| pSVA2131        | Amp <sup>r</sup> , Cam <sup>r</sup> , pETDuet-1 carrying N-terminal His <sub>6</sub> tagged <i>sflaH</i> D122N in MCS1 using restriction sites EcoRI-HindIII                                                   | This study               |

|          |                                                                                                                                                            |            |
|----------|------------------------------------------------------------------------------------------------------------------------------------------------------------|------------|
| pSVA2167 | Amp <sup>r</sup> , Cam <sup>r</sup> , pETDuet-1 carrying N-terminal His <sub>6</sub> tagged <i>PfflaH</i> in MCS1 using restriction sites BamHI-NotI       | This study |
| pSVA2176 | Amp <sup>r</sup> , Cam <sup>r</sup> , pETDuet-1 carrying N-terminal His <sub>6</sub> tagged <i>PfflaH</i> K53A in MCS1 using restriction sites BamHI-NotI  | This study |
| pSVA2178 | Amp <sup>r</sup> , Cam <sup>r</sup> , pETDuet-1 carrying N-terminal His <sub>6</sub> tagged <i>PfflaH</i> D140A in MCS1 using restriction sites BamHI-NotI | This study |
| pSVA3116 | Amp <sup>r</sup> , Cam <sup>r</sup> , pETDuet-1 carrying N-terminal His <sub>6</sub> tagged <i>PfflaH</i> in MCS1 using restriction sites EcoRI-PstI       | This study |
| pSVA3135 | C-terminal HA tagged <i>FlaH</i> <i>Wt</i> gene in pSVA1450 backbone using NcoI-EagI                                                                       | This study |
| pSVA3138 | C-terminal HA tagged <i>FlaH</i> <sup>K33A</sup> gene in pSVA1450 backbone using NcoI-EagI                                                                 | This study |
| pSVA3139 | C-terminal HA tagged <i>FlaH</i> <sup>D122N</sup> gene in pSVA1450 backbone using NcoI-EagI                                                                | This study |

**Table S3. Primer details**

| Primers | Sequence and characteristics                                                                                                                   | Source     |
|---------|------------------------------------------------------------------------------------------------------------------------------------------------|------------|
| 771     | 5'-GGGGGCATATGATTATCAGCACCGGCAACG-3'; Forward primer for <i>sflaH</i> containing an NdeI restriction site (underlined)                         | This study |
| 772     | 5'GGGGGCTCGAGTTAATGATGATGATGATGATGTGCGCGAGACA GGC-3'; Reverse primer for <i>sflaH</i> containing a XhoI restriction site (underlined)          | This study |
| 786     | 5'-GGGGGCTCGAGTTATGCGCGAGACAGGC-3'; Reverse primer for <i>sflaH</i> containing a XhoI restriction site (underlined)                            | This study |
| 2168    | 5'GGGGGCATATGTGGTCCCATCCTCAATTTGAAAAGATTATCAGC ACCGGCAACG-3'; Forward primer for <i>sflaH</i> containing an NdeI restriction site (underlined) | This study |
| 3612    | 5'-CCCCCGAATTCAATGATTATCAGCACCGGC-3'; Forward primer for <i>sflaH</i> containing a EcoRI restriction site (underlined)                         | This study |
| 3613    | 5'-GGGGGGAAGCTTTTATGCGCGAGACAGGC-3'; Reverse primer for <i>sflaH</i> containing a HindIII restriction site (underlined)                        | This study |
| 3614    | 5'-CCCGGGGGGGCCCGGGGGAAACAACGATCTC-3'; Forward primer for <i>flaH</i> down-stream containing a ApaI restriction site (underlined)              | This study |
| 3615    | 5'-CACTCGCACCCGTGCCATGATCTCC-3'; Forward primer for <i>flaHK33A</i> site directed mutagenesis                                                  | This study |



|             |                                                                                                                              |                    |            |
|-------------|------------------------------------------------------------------------------------------------------------------------------|--------------------|------------|
| 3616        | 5'-GCGAGTGTGTTATCTGCTCAATTCG-3';<br><i>flaHK33A</i> site directed mutagenesis                                                | Reverse primer for | This study |
| 3617        | 5'-CCCCCCTGCAGCCATCATAGAGGATAATGTTCC-3';<br>primer for <i>flaH</i> up-stream containing a PstI restriction site (underlined) | Reverse            | This study |
| <b>3620</b> | 5'-GGGGGGCCATGGGCCTATGATTATAAGTACCGG-3';<br>Primer for <i>flaH</i> up-stream containing a NcoI restriction site(underlined)  | Forward            | This study |
| 3627        | 5'-GACAAACTATTGATTACGATGAAGTCTATATTT-3';<br>primer for <i>flaH</i> D122N site directed mutagenesis                           | Forward            | This study |
| 3628        | 5'-GTAATCAATAGTTTGTCAATACTAGCTGCTTTCTC-3';<br>primer for <i>flaH</i> D122N site directed mutagenesis                         | Reverse            | This study |
| 3632        | 5'-GATCATGGCACGGGTGCAAGTGTGCTGAGCG-3';<br>primer for <i>sflaH</i> K33A site directed mutagenesis                             | Forward            | This study |
| 3633        | 5'-CGCTCAGCACACTTGCACCCGTGCCATGATC-3';<br>primer for <i>sflaH</i> K33A site directed mutagenesis                             | Reverse            | This study |
| 3634        | 5'-CGATTTTCATTGTTATCAATAGTCTGAGCATTCTG-3';<br>primer for <i>sflaH</i> D122N site directed mutagenesis                        | Forward            | This study |
| 3635        | 5'-CAGAATGCTCAGACTATTGATAACAATGAAATC-3';<br>primer for <i>sflaH</i> D122N site directed mutagenesis                          | Reverse            | This study |
| 3681        | 5'-CCCCCGGATCCGATGGTTCGAGGAACTCTTAAGG-3';<br>primer for <i>PfFlaH</i> containing a BamHI restriction site(underlined)        | Forward            | This study |
| 3682        | 5'-CCCCCGCGGCCGCTCACACGACTGCAGCAATCTC-3';<br>Reverse primer for <i>PfFlaH</i> containing a NotI restriction site(underlined) |                    | This study |
| 3699        | 5'-CTGGGATATTATGGACGCCCCAGTACCCCTGTCTCCTTC-3';<br>Reverse primer for <i>PfFlaH</i> K53A site directed mutagenesis            |                    | This study |
| 6000        | 5'-GGAGACAGGGGTACTGGGGCGTCCATAATATCCCAGAGAC-3';<br>Forward primer for <i>PfFlaH</i> K53A site directed mutagenesis           |                    | This study |
| 6003        | 5'-GCACGGATGAAAATGAAGCAATGATTACAACATCGGGC-3';<br>Reverse primer for <i>PfFlaH</i> D140A site directed mutagenesis            |                    | This study |
| 6004        | 5'-GCCCGATGTTGTAATCATTGCTTCATTTTCATCCGTGC-3';<br>Forward primer for <i>PfFlaH</i> D140A site directed mutagenesis            |                    | This study |
| 5109        | 5'-GGGGAATTCGATGGCGGAAGTTATGTCAC-3';<br>for <i>PfFlaI</i> containing a EcoRI restriction site(underlined)                    | Forward primer     | This study |
| 5110        | 5'-GGGCTGCAGTCAGATTCTGAAGCTTAGTC-3';<br>for <i>PfFlaI</i> containing a PstI restriction site(underlined)                     | Reverse primer     | This study |

---

5117      5'-GGCACGGCCGTTAAGCGTAATCTGGAACATCGTATGGGTATG      This  
CCCTCGATAAGGATAATGG-3';      study  
Reverse primer for HA tag FlaH containing a EagI restriction  
site(underlined)

---

## References

1. Camacho C, et al. (2009) BLAST+: architecture and applications. *BMC Bioinformatics* 10:421.
2. McWilliam H, et al. (2013) Analysis Tool Web Services from the EMBL-EBI. *Nucleic Acids Res* 41(Web Server issue). doi:10.1093/nar/gkt376.
3. Jones DT (1999) Protein secondary structure prediction based on position-specific scoring matrices. *J Mol Biol* 292(2):195–202.
